# Supplementary material
Source: PubMed Central journal article supplement (PMC4474383)
Supplement: NIHMS700147-supplement-supp_fig_legends.pdf [file NIHMS700147-supplement-supp_fig_legends.pdf]

## **Supplementary**

### **Supplementary S1. Blebbistatin treatment induces the formation of small adhesions and a crescent morphology in GFP-cdGAP expressing cells.**

**(A)** U2OS cells transfected with GFP-cdGAP were spread on 10 $\mu$ g/ml collagen coated coverslips, treated with either DMSO vehicle control or blebbistatin, and stained for paxillin and actin. Insets demonstrate that GFP-cdGAP localizes with paxillin to both large adhesions in vehicle treated cells and small adhesions in blebbistatin treated cells.

### **Supplementary S2. CdGAP localizes to 3D matrix adhesions in U2OS cells.**

**(A)** U2OS cells were seeded into 3D CDMs and then fixed and stained for endogenous cdGAP, actin, and fibronectin. **(B)** U2OS cells were co-transfected with GFP-cdGAP and mRFP-paxillin, seeded into 3D CDMs, and then fixed and stained for fibronectin.
